# Supplementary material for: Lake and Land Breezes at a Mediterranean Artificial Lake: Observations in Alqueva Reservoir, Portugal
Source: MDPI journal article supplement (doi:10.3390/atmos12050535), 2021-04-22
Supplement: s1 [file s1]

---

# Supplementary Material of

## Lake and Land Breezes at a Mediterranean Artificial Lake: Observations in Alqueva Reservoir, Portugal

Carolina Purificação <sup>1,\*</sup>, Miguel Potes <sup>1,2</sup>, Gonalo Rodrigues <sup>1,2</sup>, Rui Salgado <sup>1,2</sup> and Maria Joo Costa <sup>1,2</sup>

<sup>1</sup> University of  vora, Science and Technology School,  vora, Portugal

<sup>2</sup> Institute of Earth Sciences – ICT, University of  vora,  vora, Portugal; mpotes@uevora.pt (M.P.); grodrigues@uevora.pt (G.R.); rsal@uevora.pt (R.S.); mjcosta@uevora.pt (M.J.C.)

\* Correspondence: m40949@alunos.uevora.pt or carolina.purificacao.20@gmail.com

Table S1. Number of hours of lake breeze occurrences.

| Data    | 00h | 01h | 02h | 03h | 04h | 05h | 06h | 07h | 08h | 09h | 10h | 11h | 12h | 13h | 14h | 15h | 16h | 17h | 18h | 19h | 20h | 21h | 22h | 23h | Total |
|---------|-----|-----|-----|-----|-----|-----|-----|-----|-----|-----|-----|-----|-----|-----|-----|-----|-----|-----|-----|-----|-----|-----|-----|-----|-------|
| 2017/05 | 1   | 1   | 0   | 0   | 1   | 3   | 3   | 7   | 9   | 7   | 9   | 11  | 9   | 7   | 6   | 4   | 4   | 2   | 1   | 2   | 2   | 0   | 0   | 1   | 90    |
| 2017/06 | 2   | 0   | 0   | 0   | 1   | 1   | 3   | 6   | 10  | 12  | 11  | 10  | 10  | 10  | 9   | 6   | 6   | 5   | 4   | 2   | 3   | 0   | 0   | 1   | 112   |
| 2017/07 | 2   | 0   | 1   | 0   | 0   | 1   | 0   | 3   | 8   | 13  | 16  | 16  | 16  | 13  | 8   | 6   | 5   | 2   | 1   | 1   | 0   | 0   | 0   | 0   | 112   |
| 2017/08 | 0   | 0   | 1   | 1   | 0   | 0   | 2   | 5   | 9   | 13  | 14  | 17  | 17  | 11  | 13  | 11  | 7   | 6   | 4   | 1   | 0   | 0   | 0   | 0   | 132   |
| 2017/09 | 0   | 0   | 0   | 0   | 0   | 0   | 1   | 0   | 6   | 10  | 11  | 15  | 14  | 11  | 10  | 7   | 3   | 3   | 2   | 1   | 0   | 0   | 0   | 1   | 95    |
| 2017/10 | 0   | 2   | 1   | 1   | 0   | 0   | 1   | 3   | 9   | 10  | 8   | 10  | 9   | 8   | 6   | 4   | 1   | 0   | 1   | 1   | 0   | 0   | 1   | 0   | 76    |
| 2017/11 | 0   | 0   | 0   | 0   | 0   | 0   | 0   | 0   | 0   | 1   | 3   | 6   | 5   | 3   | 2   | 1   | 0   | 0   | 0   | 1   | 0   | 0   | 0   | 2   | 24    |
| 2017/12 | 0   | 1   | 0   | 0   | 0   | 0   | 0   | 0   | 0   | 2   | 3   | 7   | 7   | 4   | 4   | 1   | 0   | 0   | 0   | 1   | 1   | 0   | 1   | 1   | 33    |
| 2018/01 | 1   | 0   | 0   | 0   | 0   | 0   | 0   | 0   | 0   | 1   | 4   | 7   | 7   | 5   | 3   | 3   | 0   | 0   | 0   | 0   | 0   | 1   | 0   | 1   | 33    |
| 2018/02 | 0   | 0   | 0   | 0   | 0   | 1   | 1   | 1   | 1   | 5   | 8   | 5   | 7   | 4   | 4   | 1   | 0   | 0   | 0   | 0   | 0   | 0   | 0   | 0   | 38    |
| 2018/03 | 0   | 0   | 0   | 0   | 0   | 0   | 0   | 0   | 1   | 1   | 1   | 2   | 1   | 1   | 0   | 1   | 1   | 1   | 0   | 0   | 0   | 0   | 0   | 0   | 10    |
| 2018/04 | 0   | 0   | 0   | 0   | 0   | 0   | 0   | 0   | 2   | 3   | 5   | 7   | 7   | 6   | 4   | 2   | 2   | 4   | 0   | 0   | 0   | 0   | 0   | 0   | 42    |
| 2018/05 | 0   | 1   | 0   | 0   | 1   | 0   | 1   | 2   | 2   | 8   | 10  | 12  | 10  | 6   | 7   | 4   | 2   | 1   | 0   | 0   | 0   | 0   | 0   | 0   | 67    |
| 2018/06 | 0   | 0   | 0   | 0   | 0   | 0   | 1   | 4   | 8   | 9   | 8   | 7   | 9   | 7   | 6   | 2   | 1   | 0   | 0   | 0   | 0   | 0   | 0   | 0   | 62    |
| 2018/07 | 0   | 0   | 1   | 0   | 0   | 0   | 1   | 0   | 4   | 7   | 11  | 17  | 16  | 12  | 10  | 7   | 1   | 0   | 0   | 0   | 0   | 0   | 0   | 0   | 87    |
| 2018/08 | 0   | 0   | 0   | 0   | 0   | 0   | 0   | 3   | 12  | 17  | 17  | 19  | 17  | 15  | 17  | 15  | 12  | 5   | 1   | 0   | 0   | 0   | 0   | 1   | 151   |
| 2018/09 | 0   | 0   | 0   | 0   | 0   | 0   | 0   | 2   | 11  | 10  | 12  | 11  | 16  | 15  | 14  | 11  | 5   | 1   | 0   | 0   | 0   | 0   | 0   | 0   | 108   |
| 2018/10 | 0   | 0   | 0   | 0   | 0   | 0   | 0   | 1   | 4   | 6   | 7   | 8   | 12  | 12  | 9   | 7   | 3   | 0   | 0   | 0   | 0   | 0   | 0   | 0   | 69    |
| 2018/11 | 0   | 0   | 0   | 0   | 0   | 0   | 1   | 0   | 0   | 1   | 0   | 2   | 4   | 3   | 4   | 3   | 1   | 0   | 1   | 0   | 0   | 0   | 0   | 0   | 20    |
| 2018/12 | 0   | 0   | 0   | 0   | 0   | 0   | 0   | 0   | 0   | 1   | 1   | 3   | 3   | 4   | 5   | 3   | 0   | 0   | 0   | 0   | 0   | 0   | 0   | 0   | 20    |
| 2019/01 | 0   | 0   | 0   | 0   | 0   | 0   | 0   | 0   | 0   | 0   | 5   | 7   | 7   | 6   | 3   | 5   | 3   | 0   | 0   | 0   | 0   | 0   | 0   | 0   | 36    |
| 2019/02 | 0   | 0   | 0   | 0   | 0   | 0   | 0   | 0   | 0   | 1   | 4   | 8   | 6   | 4   | 4   | 3   | 1   | 0   | 0   | 0   | 0   | 0   | 0   | 0   | 31    |
| 2019/03 | 0   | 0   | 0   | 0   | 0   | 0   | 0   | 0   | 1   | 2   | 4   | 4   | 7   | 7   | 4   | 3   | 1   | 0   | 0   | 0   | 0   | 0   | 0   | 0   | 33    |
| 2019/04 | 1   | 0   | 0   | 0   | 0   | 0   | 0   | 3   | 4   | 7   | 7   | 9   | 9   | 7   | 7   | 4   | 1   | 1   | 0   | 0   | 0   | 0   | 0   | 0   | 60    |
| Total   | 7   | 5   | 4   | 2   | 3   | 6   | 15  | 40  | 101 | 147 | 179 | 220 | 225 | 181 | 159 | 114 | 60  | 31  | 15  | 10  | 6   | 1   | 2   | 8   | 1541  |

**Table S2.** Number of hours of land breeze occurrences.

| Data    | 00h | 01h | 02h | 03h | 04h | 05h | 06h | 07h | 08h | 09h | 10h | 11h | 12h | 13h | 14h | 15h | 16h | 17h | 18h | 19h | 20h | 21h | 22h | 23h | Total |
|---------|-----|-----|-----|-----|-----|-----|-----|-----|-----|-----|-----|-----|-----|-----|-----|-----|-----|-----|-----|-----|-----|-----|-----|-----|-------|
| 2017/05 | 11  | 10  | 11  | 12  | 7   | 2   | 1   | 0   | 1   | 0   | 0   | 0   | 1   | 1   | 1   | 1   | 0   | 2   | 4   | 6   | 4   | 6   | 7   | 7   | 95    |
| 2017/06 | 4   | 7   | 6   | 9   | 3   | 4   | 2   | 0   | 1   | 0   | 0   | 0   | 1   | 1   | 0   | 0   | 1   | 1   | 0   | 2   | 3   | 3   | 4   | 5   | 57    |
| 2017/07 | 5   | 6   | 4   | 7   | 5   | 4   | 1   | 3   | 1   | 0   | 0   | 0   | 0   | 0   | 0   | 0   | 0   | 0   | 0   | 1   | 4   | 5   | 6   | 3   | 55    |
| 2017/08 | 7   | 12  | 11  | 12  | 11  | 3   | 5   | 3   | 2   | 0   | 1   | 1   | 0   | 0   | 1   | 1   | 1   | 1   | 1   | 5   | 4   | 7   | 4   | 6   | 99    |
| 2017/09 | 10  | 12  | 14  | 12  | 14  | 4   | 7   | 6   | 3   | 3   | 0   | 0   | 0   | 0   | 0   | 0   | 2   | 3   | 3   | 3   | 5   | 3   | 3   | 9   | 116   |
| 2017/10 | 22  | 20  | 21  | 21  | 23  | 20  | 16  | 6   | 0   | 1   | 0   | 0   | 0   | 0   | 0   | 1   | 6   | 16  | 16  | 18  | 18  | 22  | 18  | 22  | 287   |
| 2017/11 | 13  | 16  | 15  | 16  | 17  | 19  | 12  | 6   | 9   | 3   | 2   | 1   | 0   | 2   | 1   | 4   | 9   | 14  | 14  | 15  | 16  | 16  | 15  | 16  | 251   |
| 2017/12 | 19  | 18  | 17  | 17  | 17  | 17  | 19  | 13  | 12  | 3   | 0   | 0   | 0   | 0   | 0   | 3   | 8   | 17  | 18  | 16  | 16  | 16  | 19  | 20  | 285   |
| 2018/01 | 10  | 7   | 4   | 3   | 8   | 7   | 7   | 9   | 5   | 2   | 1   | 1   | 0   | 0   | 0   | 0   | 0   | 3   | 5   | 10  | 10  | 9   | 8   | 8   | 117   |
| 2018/02 | 8   | 11  | 11  | 11  | 7   | 7   | 7   | 6   | 4   | 0   | 0   | 0   | 0   | 0   | 0   | 0   | 0   | 0   | 2   | 5   | 7   | 7   | 12  | 9   | 114   |
| 2018/03 | 1   | 3   | 4   | 2   | 3   | 6   | 4   | 4   | 0   | 0   | 0   | 0   | 0   | 0   | 0   | 0   | 0   | 0   | 1   | 3   | 3   | 3   | 2   | 0   | 39    |
| 2018/04 | 4   | 8   | 7   | 6   | 6   | 3   | 5   | 1   | 0   | 0   | 0   | 0   | 0   | 0   | 0   | 0   | 0   | 0   | 2   | 6   | 6   | 6   | 6   | 5   | 71    |
| 2018/05 | 5   | 5   | 10  | 7   | 7   | 7   | 5   | 2   | 0   | 0   | 0   | 0   | 0   | 0   | 0   | 0   | 1   | 0   | 0   | 1   | 4   | 5   | 6   | 8   | 73    |
| 2018/06 | 1   | 2   | 2   | 3   | 3   | 5   | 1   | 0   | 0   | 0   | 0   | 0   | 0   | 0   | 0   | 0   | 0   | 0   | 0   | 0   | 0   | 0   | 0   | 1   | 18    |
| 2018/07 | 1   | 4   | 3   | 5   | 6   | 5   | 2   | 0   | 0   | 0   | 0   | 0   | 1   | 0   | 0   | 0   | 0   | 0   | 0   | 0   | 0   | 0   | 0   | 1   | 28    |
| 2018/08 | 7   | 10  | 9   | 8   | 10  | 13  | 10  | 1   | 0   | 0   | 0   | 0   | 0   | 0   | 0   | 0   | 0   | 1   | 2   | 6   | 4   | 2   | 4   | 5   | 92    |
| 2018/09 | 14  | 16  | 16  | 13  | 12  | 14  | 13  | 6   | 0   | 0   | 0   | 0   | 0   | 0   | 0   | 0   | 0   | 0   | 4   | 8   | 2   | 4   | 3   | 7   | 132   |
| 2018/10 | 12  | 12  | 9   | 12  | 10  | 14  | 11  | 11  | 1   | 1   | 0   | 0   | 0   | 0   | 0   | 0   | 0   | 1   | 5   | 8   | 9   | 7   | 10  | 9   | 142   |
| 2018/11 | 7   | 5   | 5   | 5   | 5   | 4   | 3   | 5   | 5   | 0   | 0   | 0   | 0   | 0   | 0   | 0   | 0   | 1   | 5   | 6   | 7   | 8   | 7   | 8   | 86    |
| 2018/12 | 16  | 12  | 15  | 9   | 12  | 13  | 9   | 8   | 8   | 1   | 0   | 0   | 0   | 0   | 0   | 1   | 0   | 8   | 12  | 13  | 14  | 17  | 16  | 10  | 194   |
| 2019/01 | 22  | 20  | 18  | 18  | 18  | 20  | 22  | 20  | 17  | 7   | 0   | 1   | 0   | 0   | 0   | 0   | 0   | 10  | 13  | 17  | 16  | 17  | 16  | 20  | 292   |
| 2019/02 | 15  | 16  | 14  | 14  | 15  | 16  | 14  | 14  | 8   | 0   | 0   | 0   | 0   | 0   | 0   | 0   | 0   | 0   | 11  | 10  | 12  | 12  | 13  | 13  | 197   |
| 2019/03 | 15  | 18  | 19  | 19  | 18  | 19  | 18  | 13  | 1   | 0   | 0   | 0   | 0   | 0   | 0   | 0   | 0   | 0   | 8   | 15  | 14  | 15  | 19  | 17  | 228   |
| 2019/04 | 8   | 9   | 7   | 10  | 10  | 12  | 9   | 0   | 0   | 0   | 0   | 0   | 0   | 0   | 0   | 0   | 0   | 0   | 0   | 2   | 7   | 5   | 6   | 7   | 92    |
| Total   | 237 | 259 | 252 | 251 | 247 | 238 | 203 | 137 | 78  | 21  | 4   | 4   | 3   | 4   | 3   | 11  | 28  | 78  | 126 | 176 | 185 | 195 | 204 | 216 | 3160  |

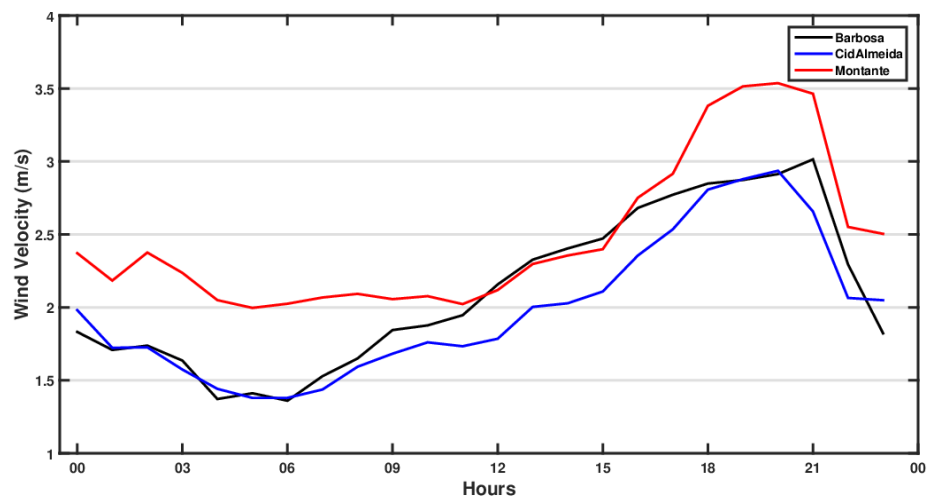

Figure S1. Daily cycle of the wind velocity in Alqueva in August 2018.

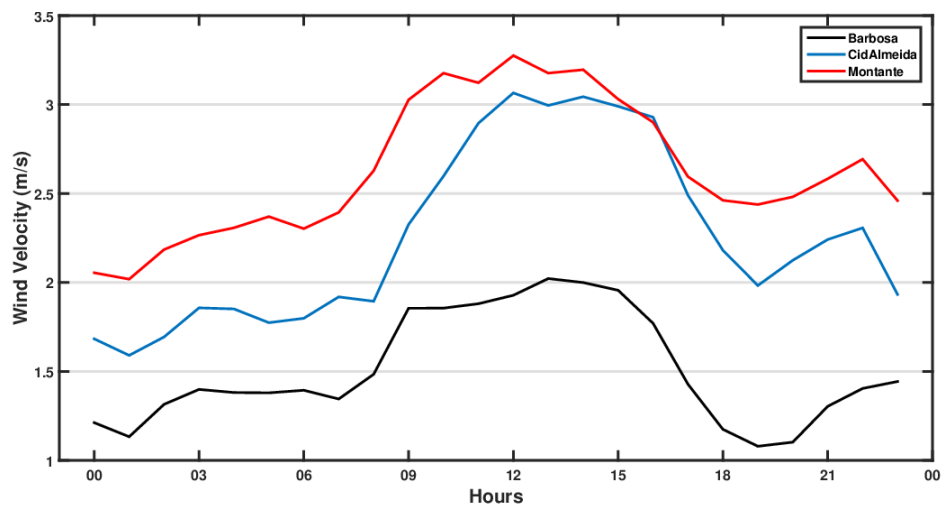

Figure S2. Daily cycle of the wind velocity in Alqueva in January 2019.
